# Supplementary material for: Simultaneously enhanced piezoelectric properties and thermal stability of Pb(Zr, Ti)O3-based ceramics by a composition design strategy
Source: Royal Society of Chemistry journal article supplement (doi:10.1039/d5tc00778j), 2025-01-01
Supplement: d5tc00778j1.pdf [file d5tc00778j1.pdf]

## Supplementary Information for

### **Simultaneously enhanced piezoelectric properties and thermal stability of Pb(Zr, Ti)O<sub>3</sub>-based ceramics by composition design strategy**

Mingwang Yuan,<sup>a</sup> Junhui Lang,<sup>a</sup> Yingzhi Meng,<sup>a</sup> Silin Tang,<sup>b</sup> Niyu Jiang,<sup>a</sup> Liming Quan,<sup>a</sup> Dongyan Yu,<sup>\*c</sup> Biao Zhang,<sup>a</sup> Wangxin Li,<sup>a</sup> Qingqing Ke,<sup>b</sup> Pengrong Ren,<sup>\*d</sup>  
Laijun Liu<sup>\*a</sup>

<sup>a</sup> *Guangxi Key Lab of Optical and Electronic Functional Materials and Devices; Collaborative Innovation Center for Exploration of Nonferrous Metal Deposits and Efficient Utilization of Resources; College of Materials Science and Engineering; Guilin University of Technology, Guilin, 541004, China*

<sup>b</sup> *School of Microelectronics Science and Technology, Sun Yat-sen University, Zhuhai 519082, Guangdong, China*

<sup>c</sup> *Guangxi Key Laboratory of Special Engineering Equipment and Control, Guilin University of Aerospace Technology, Guilin Guangxi 541004*

<sup>d</sup> *Shaanxi Province Key Laboratory for Electrical Materials and Infiltration Technology, School of Materials Science and Engineering, Xi'an University of Technology, Xi'an, 710048, China*

**Table S1** Lattice parameters obtained from the Rietveld structural refinements.

| $x$   | Space group | Lattice parameters   |                      |                      |                                     | Cell volume ( $\text{\AA}^3$ ) | Phase content (%) | Tetragonality ( $c/a$ ) |
|-------|-------------|----------------------|----------------------|----------------------|-------------------------------------|--------------------------------|-------------------|-------------------------|
|       |             | $a$ ( $\text{\AA}$ ) | $b$ ( $\text{\AA}$ ) | $c$ ( $\text{\AA}$ ) | Angle ( $^\circ$ )                  |                                |                   |                         |
| 0     | $P4mm$      | 4.0506               | 4.0506               | 4.1213               | $\alpha = \beta = \gamma = 90$      | 67.618                         | 13.34             | 1.017                   |
|       | $R3m$       | 4.0737               | 4.0737               | 4.0737               | $\alpha = \beta = \gamma = 89.707$  | 67.602                         | 86.66             |                         |
| 0.005 | $P4mm$      | 4.0487               | 4.0487               | 4.1208               | $\alpha = \beta = \gamma = 90$      | 67.550                         | 70.13             | 1.018                   |
|       | $R3m$       | 4.0736               | 4.0736               | 4.0736               | $\alpha = \beta = \gamma = 89.713$  | 67.596                         | 29.97             |                         |
| 0.01  | $P4mm$      | 4.0475               | 4.0475               | 4.1206               | $\alpha = \beta = \gamma = 90$      | 67.504                         | 53.24             | 1.018                   |
|       | $R3m$       | 4.0735               | 4.0735               | 4.0735               | $\alpha = \beta = \gamma = 89.715$  | 67.594                         | 46.76             |                         |
| 0.015 | $P4mm$      | 4.0466               | 4.0466               | 4.1199               | $\alpha = \beta = \gamma = 90$      | 67.465                         | 60.91             | 1.018                   |
|       | $R3m$       | 4.0730               | 4.0730               | 4.0730               | $\alpha = \beta = \gamma = 89.719$  | 67.564                         | 39.09             |                         |
| 0.02  | $P4mm$      | 4.0465               | 4.0465               | 4.1209               | $\alpha = \beta = \gamma = 90$      | 67.468                         | 66.35             | 1.018                   |
|       | $R3m$       | 4.0725               | 4.0725               | 4.0725               | $\alpha = \beta = \gamma = 89.7357$ | 67.522                         | 33.65             |                         |
| 0.025 | $P4mm$      | 4.0451               | 4.0451               | 4.1215               | $\alpha = \beta = \gamma = 90$      | 67.443                         | 77.09             | 1.019                   |
|       | $R3m$       | 4.0719               | 4.0719               | 4.0719               | $\alpha = \beta = \gamma = 89.769$  | 67.514                         | 22.91             |                         |

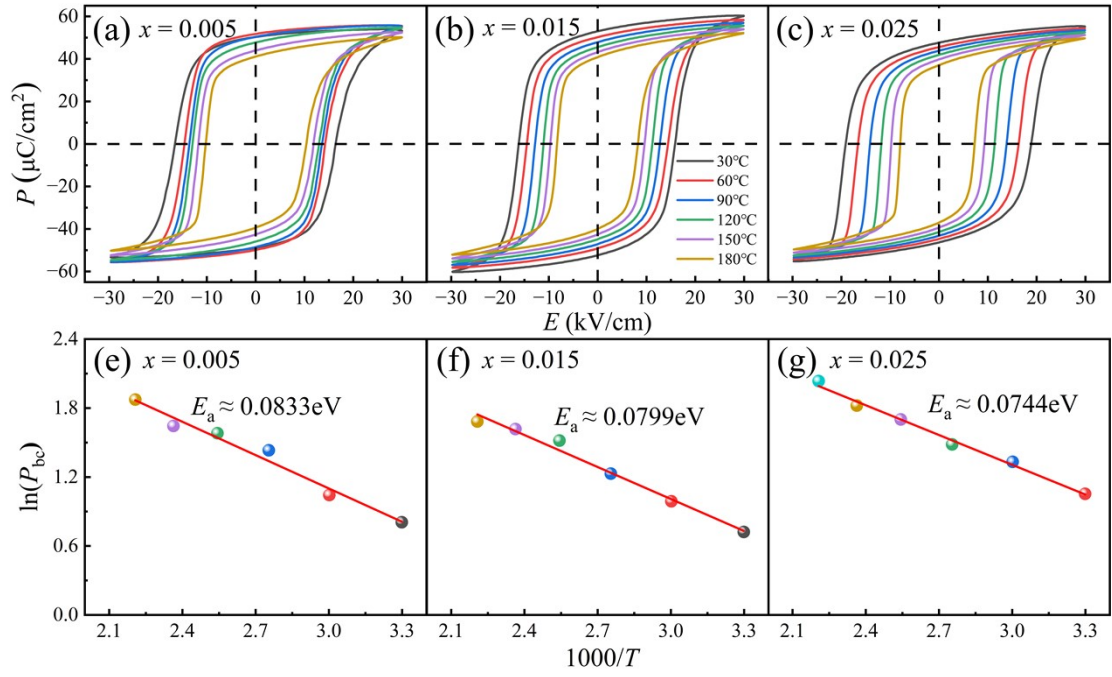

Fig.S1 (a)-(c) The  $P$ - $E$  loops dependence of  $\text{Nd}_2\text{O}_3$  content for the PNZTN- $x$  ceramics; (d)-(f) Plot of  $\ln(P_{bc})$  versus  $1000/T$ .

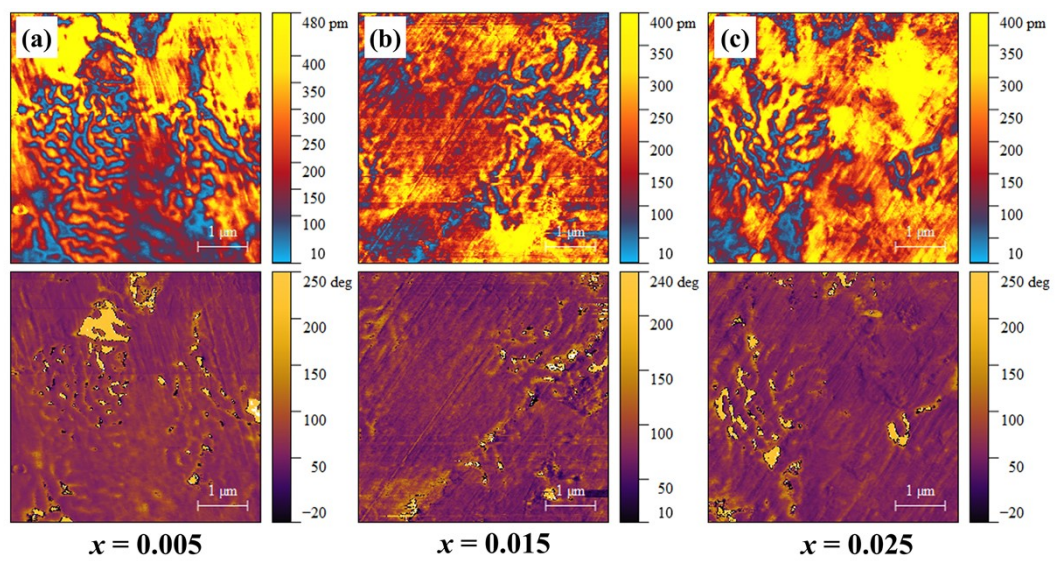

Fig.S2 PFM measurements for the PNZTN- $x$  ceramics with (a)  $x = 0.005$ , (b)  $x = 0.015$ , (c)  $x = 0.025$ .
